# Supplementary material
Source: publisher figshare collection journal article supplement (https://acs.figshare.com/ndownloader/files/4187335)
Supplement: Supplementary file 1 [file 4187335]

## Supporting Information:

### Luminescence Rigidochromism and Redox Chemistry of Pyrazolate-Bridged Binuclear Platinum(II) Diimine Complex Intercalated into Zirconium Phosphate Layers

Eladio J. Rivera,<sup>†</sup> Cindy Barbosa,<sup>†</sup> Rafael Torres,<sup>†</sup> Harry Rivera,<sup>†</sup> Estevao R. Fachini,<sup>†</sup> Tyler W. Green,<sup>§</sup> and William B. Connick<sup>§</sup>, and Jorge L. Colón<sup>†\*</sup>

<sup>†</sup>Department of Chemistry, University of Puerto Rico, P.O. Box 23346, Río Piedras, P.R. 00931, USA

<sup>§</sup>Department of Chemistry, University of Cincinnati, P.O. Box 210172, Cincinnati, Ohio 45221-0172, USA

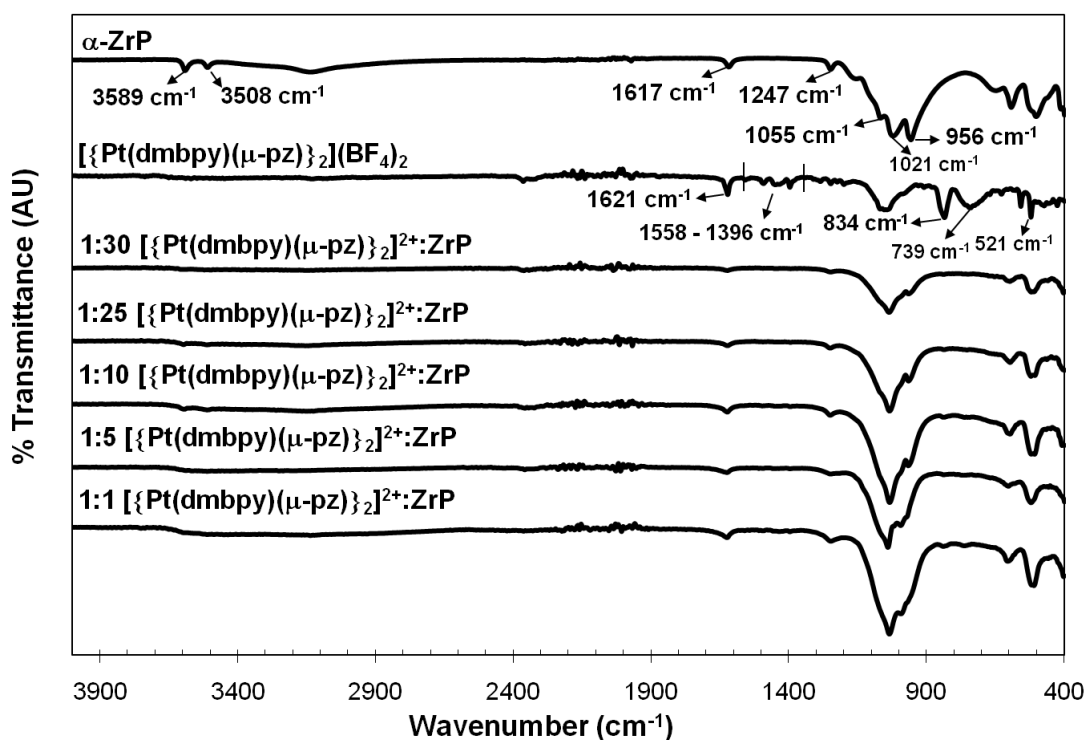

**Figure S1.** IR spectra of  $\alpha$ -ZrP,  $[\text{Pt}(\text{dmbpy})(\mu\text{-pz})_2](\text{BF}_4)_2$ , and  $[\text{Pt}(\text{dmbpy})(\mu\text{-pz})_2]^{2+}$ -exchanged ZrP at different loading levels.

**FT-IR Results:** The  $\theta$ -ZrP material possesses an IR spectrum similar to that of  $\alpha$ -ZrP. The  $\alpha$ -ZrP spectrum exhibits three bands at 3589, 3508, and 1617  $\text{cm}^{-1}$  corresponding to OH water stretching vibrations in ZrP and the “lattice” water band.<sup>83,84</sup> Upon the intercalation of  $[\text{Pt}(\text{dmbpy})(\mu\text{-pz})_2]^{2+}$  the water is displaced from the ZrP lattice. The phosphate groups give rise to bands near 1021  $\text{cm}^{-1}$  due to orthophosphate vibrations, a band at 1247  $\text{cm}^{-1}$  attributed to

the deformation of the P-O-H bond and one at 956 cm<sup>-1</sup> corresponding to the vibrations of the phosphate group with symmetry C<sub>3v</sub>. The spectra of the intercalated materials show some characteristic bands of this layered material in the region from 2000 to 400 cm<sup>-1</sup>. The IR spectrum of the [Pt(dmbpy)(μ-pz)<sub>2</sub>]<sup>2+</sup> complex shows bands at 1621, 834 and 739 cm<sup>-1</sup> due to ν(C=C), ν(C-H) and ν(C=N) of the bridge pyrazolate ligands.<sup>85,86</sup> The vibrational bands at 1558-1396 cm<sup>-1</sup> are due to the bipyridyl ring vibrations and the 1448 and 1396 cm<sup>-1</sup> bands correspond to the CH<sub>3</sub> vibrations of the dmbpy ligand.<sup>56,87</sup> In addition, a sharp medium intensity band located at 521 cm<sup>-1</sup> is characteristic of the Pt-N vibrational band.<sup>85,88,89</sup> As the loading increases, the intercalated materials show bands at 1623, 1396, 839, 762 and 520 cm<sup>-1</sup>, corresponding to vibrations of the platinum complex. There is no evidence of the presence of uncoordinated pyrazolate ligand since no ν(N-H) band is observed in the 3460-3380 cm<sup>-1</sup> region.<sup>90</sup> The most prominent difference occurs in the phosphate group region in which the vibrational bands are shifted to higher frequencies, from 1021 to 1035 cm<sup>-1</sup> and 956 cm<sup>-1</sup> to 993 cm<sup>-1</sup>, respectively. This shift may result from more restricted phosphate group vibrational motions and a crowding of the dimer molecules as the loading level increases within the ZrP.

#### References:

- (56) Martí, A.; Paroliti, G.; Maldonado, L.; Colón, J. L. *Inorg. Chim. Acta* **2007**, *360*, 1535-1542.
- (83) Horsley, S. E.; Nowell, D. V.; Stewart, D. T. *Spectrochim. Acta* **1974**, *30A*, 535-541.
- (84) Casciola, M.; Donnadio, A.; Montanari, F.; Piaggio, P.; Valentini, V. *J. Solid State Chem.* **2007**, *180*, 1198-1208.
- (85) Boixassa, A.; Pons, J.; Solans, X.; Font-Bardia, M.; Ros, J. *Inorg. Chem. Comm.* **2003**, *6*, 922-925.
- (86) Zecchina, A.; Cerruti, L.; Coluccia, S.; Borello, E. *J. Chem. Soc.* **1967**, 1363-1367.
- (87) Hennessy, B.; Megelski, S.; Marcolli, C.; Shklover, V.; Barlocher, C.; Calzaferri, G. *J. Phys. Chem. B* **1999**, *103*, 3340-3351.
- (88) Gillard, R. D.; Sengul, A. *Trans. Metal. Chem.* **2001**, *26*, 339-341.
- (89) Annibale, G.; Brandolisio, M.; Pitteri, B. *Polyhedron* **1995**, *14*, 451-453.
- (90) López, G.; Ruiz, J.; Vicente, C.; Martí, J.; García, G.; Chaloner, P.; Hitchcock, P.; Harrison, R. M. *Organometallics* **1992**, *11*, 4090-4096.

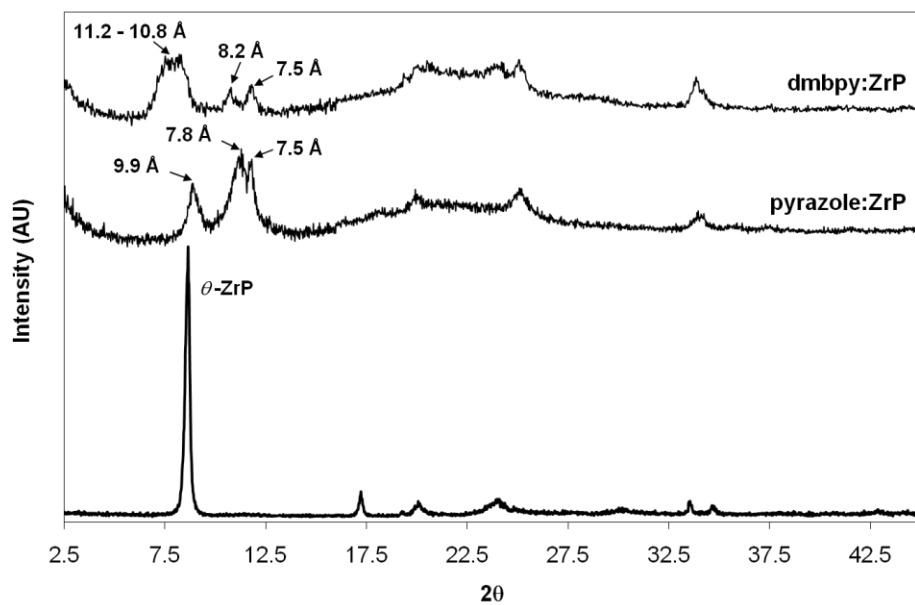

**Figure S2.** XRPD patterns of dmbpy- and pyrazole-intercalated ZrP materials and  $\theta$ -ZrP.

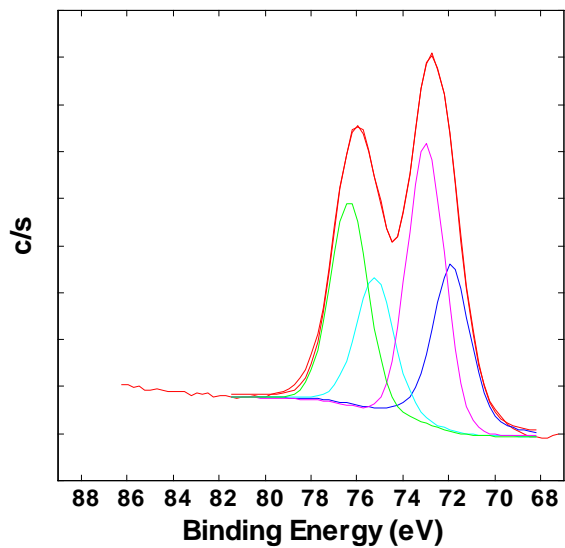

**Figure S3.** High resolution XPS spectra for the yellow-brown powders of 1:1  $[\{\text{Pt}(\text{dmbpy})(\mu\text{-pz})\}_2]^{2+}$ -exchanged ZrP at the Pt 4f binding energy region. The red color spectrum represents the fitted curved of the individual function doublet peaks.
